# Supplementary material for: Breath volatile organic compounds for chronic kidney disease progression monitoring
Source: Royal Society of Chemistry journal article supplement (doi:10.1039/d3an01057k), 2023-11-03
Supplement: d3an01057k1.pdf [file d3an01057k1.pdf]

## Electronic supplementary information

### Breath volatile organic compounds for chronic kidney disease progression monitoring

Lei Li,<sup>a, b</sup> Jue Wang,<sup>c</sup> Fei Feng,<sup>a, b, \*</sup> Jiayi Yan,<sup>c</sup> Bin Zhao,<sup>a, b</sup> Xinxin Li,<sup>a, b, d</sup> Yifei Zhong<sup>c, \*</sup>

<sup>a</sup> State Key Laboratory of Transducer Technology, Shanghai Institute of Microsystem and Information Technology, Chinese Academy of Sciences, Shanghai 200050, China

<sup>b</sup> Center of Materials Science and Optoelectronics Engineering, University of Chinese Academy of Sciences, Beijing 100049, China

<sup>c</sup> Department of Nephrology, Longhua Hospital, Shanghai University of Traditional Chinese Medicine, Shanghai 200032, China

<sup>d</sup> Xin-Huangpu Joint Innovation Institute of Chinese Medicine, Guangzhou 510799, China

\*Corresponding author. E-mail address: fengfei507@mail.sim.ac.cn (Fei Feng); E-mail address: yifeilily@126.com (Yifei Zhong)

#### Supplementary Tables

**Table S1** *p*-Values of 4-heptanone, *n*-octane, and *n*-dodecane t-tests between male and female patients, as well as between current smoking/ex-smoking and never smoking patients

| Factor                                                       | <i>p</i> -Value |                  |                    |
|--------------------------------------------------------------|-----------------|------------------|--------------------|
|                                                              | 4-heptanone     | <i>n</i> -octane | <i>n</i> -dodecane |
| Gender (male vs female)                                      | 0.195           | 0.742            | 0.266              |
| Smoking habits (current smoking/ex-smoking vs never smoking) | 0.655           | 0.823            | 0.550              |

**Table S2** Results of test of significance of Pearson's correlation coefficient between 4-heptanone, *n*-octane, and *n*-dodecane and age and BMI

| Factor                                 | Test of significance of Pearson's correlation coefficient | VOC <sup>a</sup> |                  |                    |
|----------------------------------------|-----------------------------------------------------------|------------------|------------------|--------------------|
|                                        |                                                           | 4-heptanone      | <i>n</i> -octane | <i>n</i> -dodecane |
| Age (year)                             | <i>r</i>                                                  | 0.085            | 0.243            | 0.142              |
|                                        | <i>p</i> -Value                                           | 0.507            | 0.064            | 0.283              |
| BMI (kg m <sup>-2</sup> ) <sup>b</sup> | <i>r</i>                                                  | 0.144            | 0.071            | 0.165              |
|                                        | <i>p</i> -Value                                           | 0.275            | 0.592            | 0.212              |

<sup>a</sup> VOC: volatile organic compound. <sup>b</sup> BMI: body mass index.
